# Supplementary material for: Synthesis, structure, spectroscopic properties and cytotoxic effect of some thiosemicarbazone complexes of palladium
Source: Royal Society of Chemistry journal article supplement (doi:10.1039/b707448d), 2007-09-06
Supplement: b707448d.pdf [file b707448d.pdf]

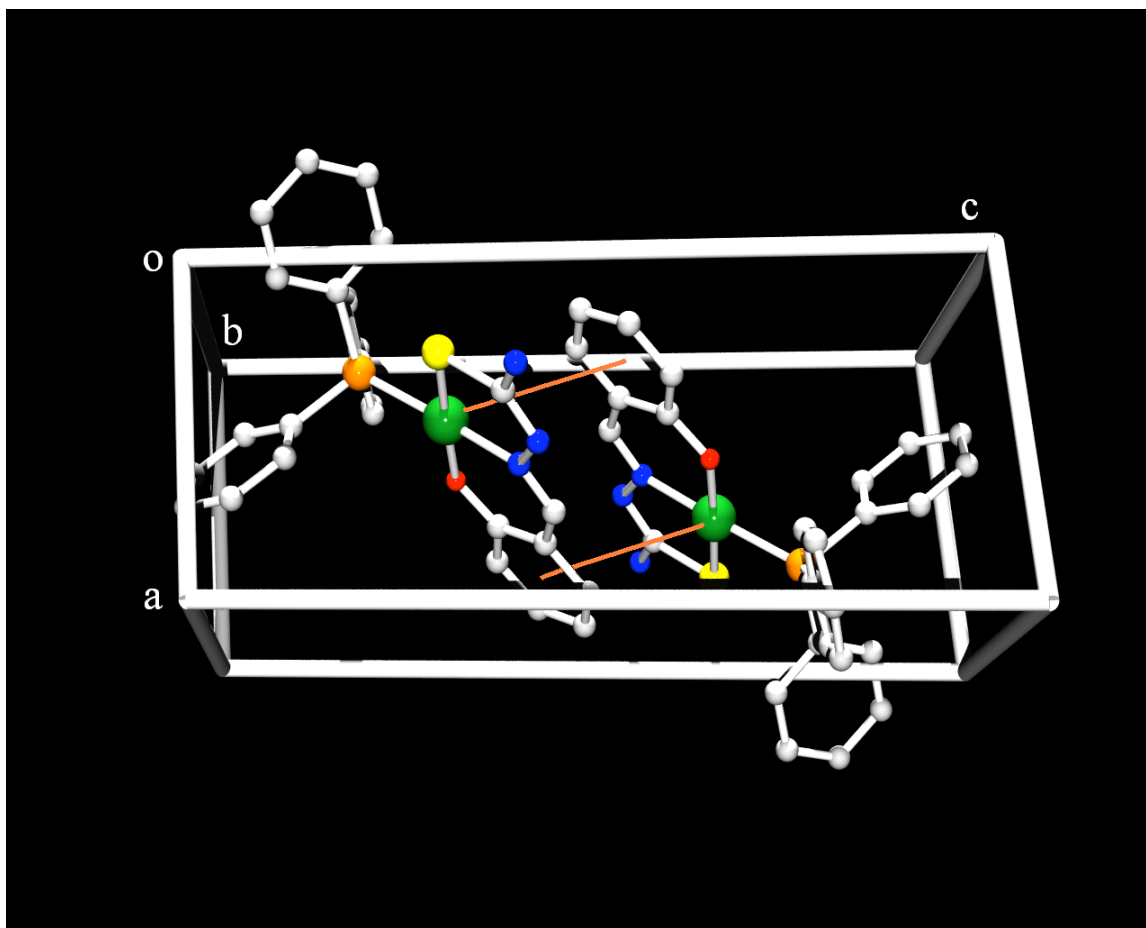

**Figure S1.** Inter-molecular metal- $\pi$  interactions in the  $[\text{Pd}(\text{L}^2)(\text{PPh}_3)]$  complex.

**Table S1.** Metal- $\pi$  and  $\pi$ - $\pi$  interactions in the  $[\text{Pd}(\text{L}^1)(\text{PPh}_3)]$  and  $[\text{Pd}(\text{L}^2)(\text{pic})]$  complexes respectively

| <b>metal...<math>\pi</math> Interaction in <math>[\text{Pd}(\text{L}^1)(\text{PPh}_3)]</math></b>                     |               |                 |                      |         |                         |                         |
|-----------------------------------------------------------------------------------------------------------------------|---------------|-----------------|----------------------|---------|-------------------------|-------------------------|
| Cg(i)...Metal                                                                                                         | Symmetry      | $\pi$ ...M      | $\pi$ ...M<br>(perp) | $\beta$ |                         |                         |
| Cg(3) $\rightarrow$ Pd                                                                                                | 1-x, 1-y, 1-z | 3.999           | 3.322                | 33.8    |                         |                         |
| Ring ( Cg1 ) C(1) $\rightarrow$ C(2) $\rightarrow$ C(3) $\rightarrow$ C(4) $\rightarrow$ C(5) $\rightarrow$ C(6)      |               |                 |                      |         |                         |                         |
| <b><math>\pi</math>...<math>\pi</math> Interaction in <math>[\text{Pd}(\text{L}^2)(\text{pic})]</math></b>            |               |                 |                      |         |                         |                         |
| Cg(i)...Cg(j)                                                                                                         | Symmetry      | $\pi$ ... $\pi$ | $\alpha$             | $\beta$ | Cg(i)...Cg(j)<br>(perp) | Cg(j)...Cg(i)<br>(perp) |
| Cg(3) $\rightarrow$ Cg(3)                                                                                             | -x, 1-y, 1-z  | 3.669(2)        | 0.0                  | 23.5    | 3.506                   | 3.506                   |
| Cg(4) $\rightarrow$ Cg(3)                                                                                             | 1-x, 1-y, 1-z | 4.562(2)        | 12.1                 | 29.0    | 3.441                   | 3.991                   |
| Ring ( Cg3 ) N(4) $\rightarrow$ C(10) $\rightarrow$ C(11) $\rightarrow$ C(12) $\rightarrow$ C(13) $\rightarrow$ C(14) |               |                 |                      |         |                         |                         |
| Ring ( Cg4 ) C(1) $\rightarrow$ C(2) $\rightarrow$ C(3) $\rightarrow$ C(4) $\rightarrow$ C(5) $\rightarrow$ C(6)      |               |                 |                      |         |                         |                         |

$\alpha$  = Dihedral angle between rings Cg(I) and Cg(J) ;  $\beta$  = Angle between Cg(I)  $\rightarrow$  Cg(J) vector and normal to ring Cg(I)

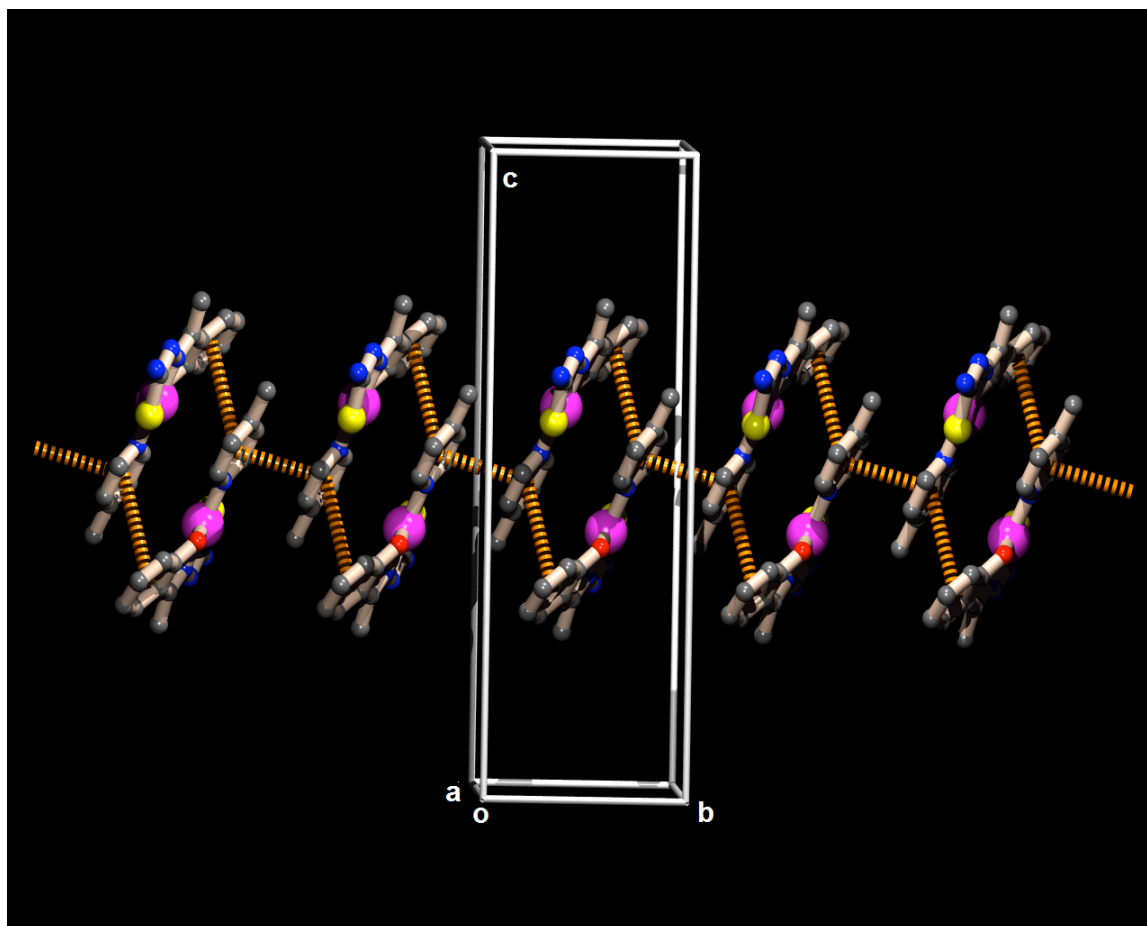

**Figure S2.** Inter-molecular  $\pi$ --- $\pi$  interactions in the  $[\text{Pd}(\text{L}^2)(\text{pic})]$  complex.

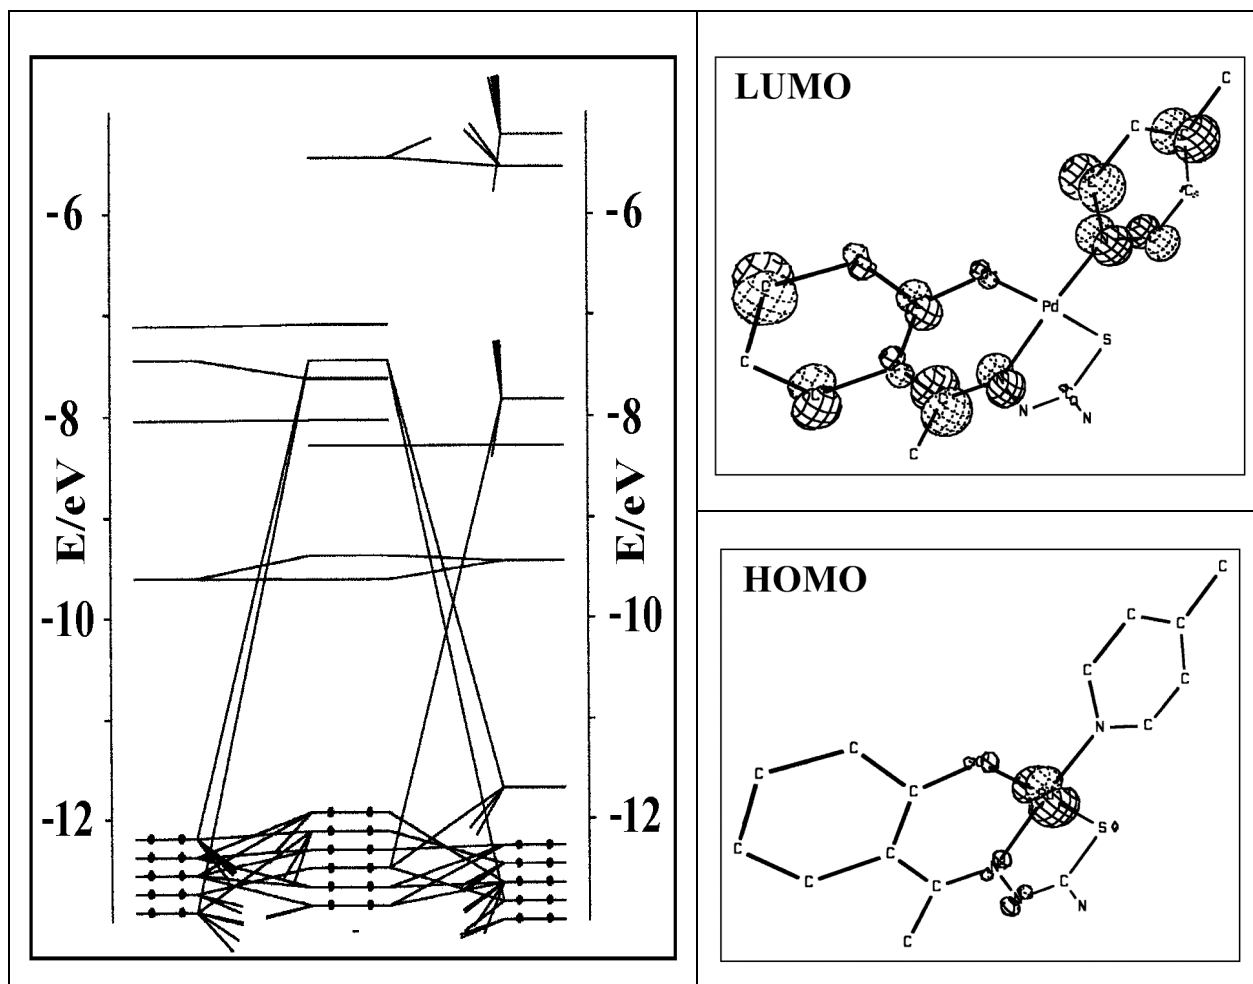

**Figure S3.** Partial molecular orbital diagram of the [Pd(L<sup>2</sup>)(pic)] complex.
